# Supplementary material for: 1,3,5-Triazine and dithienothiophene-based conjugated polymers for highly effective photocatalytic hydrogen evolution
Source: Royal Society of Chemistry journal article supplement (doi:10.1039/d2py01564a), 2023-01-01
Supplement: d2py01564a1.pdf [file d2py01564a1.pdf]

## Electronic Supporting Information

### 1,3,5-triazine and dithienothiophene-based conjugated polymers for highly effective photocatalytic hydrogen evolution

Jie Yang,<sup>a,b</sup> Yahu A. Liu,<sup>c</sup> Ming-Ming Zhai,<sup>a</sup> Jun-Jie Qin,<sup>b</sup>  
Wei-Bo Hu,<sup>\*b</sup> Hui Yang<sup>\*a,b</sup> and Ke Wen<sup>\*a,b</sup>

<sup>a</sup> School of Physical Science and Technology, ShanghaiTech University,  
Shanghai 201210, P. R. China

<sup>b</sup> Shanghai Advanced Research Institute, Chinese Academy of Science,  
Shanghai 201210, P. R. China

<sup>c</sup> Medicinal Chemistry, ChemBridge Research Laboratories,  
San Diego, California, 92127, United States

#### \*Corresponding Authors

Wei-Bo Hu, PhD  
E-Mail: huwb@sari.ac.cn

Hui Yang, PhD  
E-Mail: yangh@sari.ac.cn

Ke Wen, PhD  
E-Mail: wenk@sari.ac.cn

## Table of Contents

|                                                                                                                                                                                                                                                             |     |
|-------------------------------------------------------------------------------------------------------------------------------------------------------------------------------------------------------------------------------------------------------------|-----|
| Synthesis of diBr-DTT and diBr-DTDO                                                                                                                                                                                                                         | S3  |
| Methods                                                                                                                                                                                                                                                     | S3  |
| The apparent quantum yield measurement                                                                                                                                                                                                                      | S4  |
| Figure S1 $^1\text{H}$ NMR (500 MHz, $\text{CDCl}_3$ ) of TzDTT                                                                                                                                                                                             | S5  |
| Figure S2 $^1\text{H}$ NMR (500 MHz, $\text{CDCl}_3$ ) of TzDTDO                                                                                                                                                                                            | S5  |
| Figure S3     The elemental mapping of TzDTT                                                                                                                                                                                                                | S6  |
| Figure S4     The elemental mapping of TzDTDO                                                                                                                                                                                                               | S6  |
| Figure S5     Scanning electron microscope images of TzDTDO and TzDTT                                                                                                                                                                                       | S7  |
| Table S1     Element analysis of obtained polymers                                                                                                                                                                                                          | S7  |
| Figure S6     TGA profile of polymers under $\text{N}_2$ atmosphere                                                                                                                                                                                         | S8  |
| Figure S7     Powder XRD patterns of <b>TzDTT</b> and <b>TzDTDO</b>                                                                                                                                                                                         | S8  |
| Figure S8     DFT geometry optimization and the dihedral angles of the polymers                                                                                                                                                                             | S9  |
| Figure S9     The Models of the two polymers and water molecule calculated by DFT theory                                                                                                                                                                    | S9  |
| Figure S10    UPS spectrum of <b>TzDTDO</b>                                                                                                                                                                                                                 | S10 |
| Figure S11    The contact angles of the two polymers                                                                                                                                                                                                        | S10 |
| Figure S12    Electrochemical impedance spectroscopy (EIS) Nyquist plots of the polymers                                                                                                                                                                    | S11 |
| Figure S13    The AFM image of the two polymers dispersed ultrasonically in $\text{H}_2\text{O}$ ,<br>MeCN/ $\text{H}_2\text{O}$ (1:2) and DMSO/ $\text{H}_2\text{O}$ (1:2), respectively.                                                                  | S11 |
| Figure S14    The size distribution of the two polymers tested by DLS                                                                                                                                                                                       | S12 |
| Figure S15    The AFM image of the two polymers dispersed ultrasonically in $\text{H}_2\text{O}$ ,<br>MeCN/ $\text{H}_2\text{O}$ (1:2) and DMSO/ $\text{H}_2\text{O}$ (1:2), respectively                                                                   | S12 |
| Figure S16    (a)The solid $^{13}\text{C}$ NMR, (b)FT-IR, (c)solid UV/Vis and (d)PL spectra of<br><b>TzDTDO</b> befoe/after PHP in $\text{H}_2\text{O}/\text{AA}$ for 24 h                                                                                  | S13 |
| Figure S17    The HER rates of <b>TzDTDO</b> with different electron sacrificial agent and in the<br>presence of different amounts of photocatalyst                                                                                                         | S13 |
| Figure S18    (a) DRS UV/Vis spectra of <b>TzDTDO</b> samples which were synthesized in the<br>presence of various equivalents of catalyst $\text{Pd}(\text{PPh}_3)_4$ . (b) HER performance of<br><b>TzDTDO</b> samples with residual Pd in various masses | S14 |
| Figure S19    Morphology characterizations (SEM) after 24 h HER stability test                                                                                                                                                                              | S14 |
| Table S2     Fitted decay time in TRPL spectra of the two CMPs                                                                                                                                                                                              | S14 |
| Table S3     PHP Performance of <b>TzDTDO</b> and the other reported CMPs                                                                                                                                                                                   | S15 |
| References                                                                                                                                                                                                                                                  | S16 |

## Synthesis of diBr-DTT and diBr-DTDO

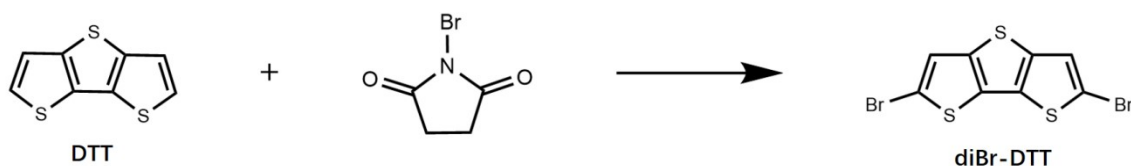

**diBr-DTT.** To a solution of dithieno[3,2-b:2',3'-d]thiophene (7.0 mmol) in a mixed solvent of  $\text{CHCl}_3$  and  $\text{AcOH}$  (54 mL, 1:1, v/v) was added NBS (2.74 g, 15.4 mmol) portionwise at 0 °C to result in a mixture which was warmed to at 25 °C and stirred for 3 h. The reaction mixture was poured into ice-water (300 mL) and extract with  $\text{CHCl}_3$  ( $3 \times 80$  mL). The combined organic extracts were washed with saturated aqueous  $\text{NaHCO}_3$  solution (20 mL) and brine (20 mL), dried over  $\text{Na}_2\text{SO}_4$ , and concentrated under reduced pressure to afford a residue which was subjected to a column chromatography on silica gel with DCM as eluent. The product obtained from the chromatography was recrystallized from a DCM/hexanes solution to furnish **diBr-DTT** as an off-white solid.  $^1\text{H NMR}$  (400 MHz,  $\text{CDCl}_3$ ):  $\delta$  7.28 (s, 2H).

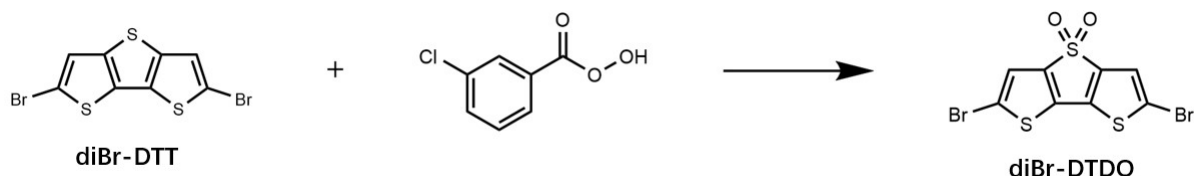

**diBr-DTDO.** To a solution of DTT (177.0 mg, 0.5 mmol) in DCM (15 mL) was added 3-chloroperoxybenzoic acid (216.0 mg, 80% purity, 1.0 mmol) to result in a mixture which was heated under gentle reflux for 2 d, cooled to the reaction mixture, poured into a concentrated aqueous  $\text{NaHSO}_3$  solution (150 mL), and extracted with DCM ( $3 \times 40$  mL). The combined organic extracts were washed with 5% aqueous  $\text{NaHCO}_3$  solution (10 mL) and water (mL), dried over anhydrous  $\text{MgSO}_4$ , and concentrated under reduced pressure. The residue was subjected to a column chromatography on silica gel with a mixed solvent of DCM/PE(1:4) as eluent to afford a product which was recrystallized from a solution in MeCN to furnish **diBr-DTDO** as a yellow solid (90 mg, 47%).  $^1\text{H NMR}$  (400 MHz,  $\text{CDCl}_3$ ): 7.21 (s, 2H).

## Methods

$^1\text{H}$  and  $^{13}\text{C}$  NMR analyses were performed on a 500 MHz spectrometer (Bruker AVANCE NEO 400 Ascend) in the indicated solvents at room temperature. High resolution solid-state NMR spectra were recorded on an Agilent NMR spectrometer (60054-ASC) using a standard CP pulse sequence probe with 4 mm (outside diameter) zirconia rotors. Scanning electron microscope (SEM) images were collected using scanning electron microscope (JEOL, JSM-7500F) at an accelerating voltage of 5.0 kV. TGA was carried out on an American TA-Q20 in nitrogen atmosphere using a 10 °C/min ramp without equilibration delay. The Solid-state UV-Vis absorbance was measured on a UV spectrophotometer (HITACHI, U-3900). Powder X-ray diffraction (PXRD) patterns were obtained on a PANalytical Empyrean X-ray

diffractometer with Cu K $\alpha$  line focused radiation at 40 kV and 40 mA from  $2\theta = 1^\circ$  up to  $30^\circ$  with  $0.02^\circ$  increment by Bragg-Brentano. The powdered sample was added to the glass and compacted for measurement.

N<sub>2</sub> adsorption isotherms were measured up to 1 bar at 77 K using a Micrometrics ASAP 2460 surface area analyzer. Prior to measurements, samples (ca. 100 mg) were degassed for over 12 h at 120 °C. UHP grade N<sub>2</sub> and He were used throughout the adsorption experiments. Oil-free vacuum pumps and oil-free pressure regulators were used for measurements to prevent contamination of the samples during the degassing process and isotherm measurement.

In density functional theory (DFT) calculations, structural optimization of the two structural units of TzDTDO and TzDTT was performed using Gaussian software with a B3LYP/6-31+G(d,p) basis set and an implicit SMD solvent model

### The apparent quantum yield measurement

The AQY was measured at selected wavelengths enabled by different band pass filters (400, 420, 450, 500, 550, and 600 nm) with the intensities calibrated as 25, 4.6, 21, 20, 27 and 28 mW cm<sup>-1</sup>, respectively, using a power meter (CEL-FZ-A, China Education Au-light). The AQY at a given wavelength was calculated by the following equation.

$$\text{AQY} = \frac{2 \times M \times N_A \times h \times c}{S \times P \times t \times \lambda}$$

Where M is the amount of H<sub>2</sub> (mol), N<sub>A</sub> is the Avogadro constant ( $6.022 \times 10^{23}$  /mol), h is the Planck constant ( $6.626 \times 10^{-34}$  J·s), c is the speed of light in vacuum, S is the irradiation area (9 cm<sup>2</sup> in our experiment), P is the intensity of irradiation light (W cm<sup>-2</sup>), t is the irradiation time(s), and l is the wavelength of the monochromatic light (m).

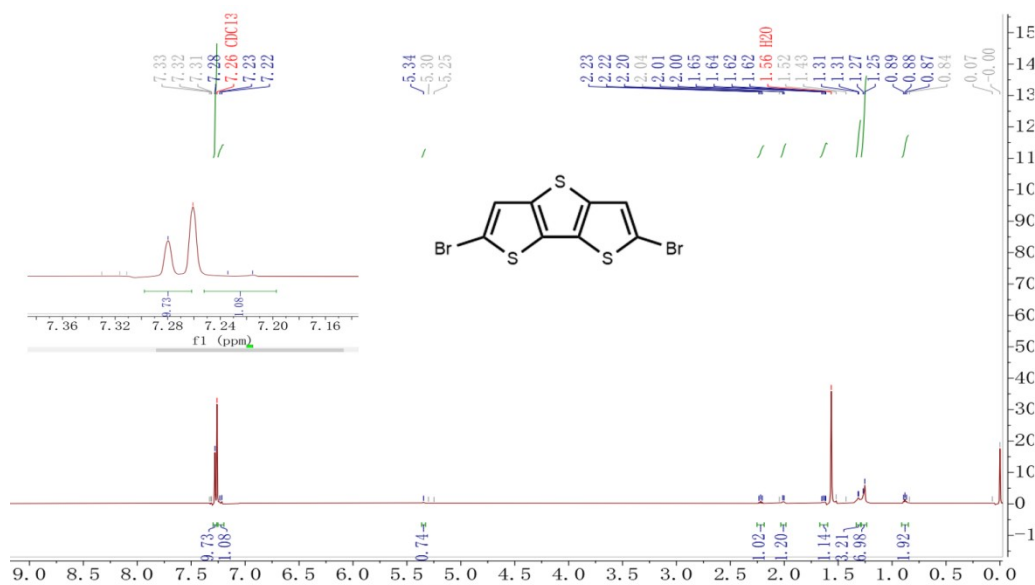

**Figure S1.**  $^1\text{H}$  NMR (500 MHz,  $\text{CDCl}_3$ ) of **TzDTT**.

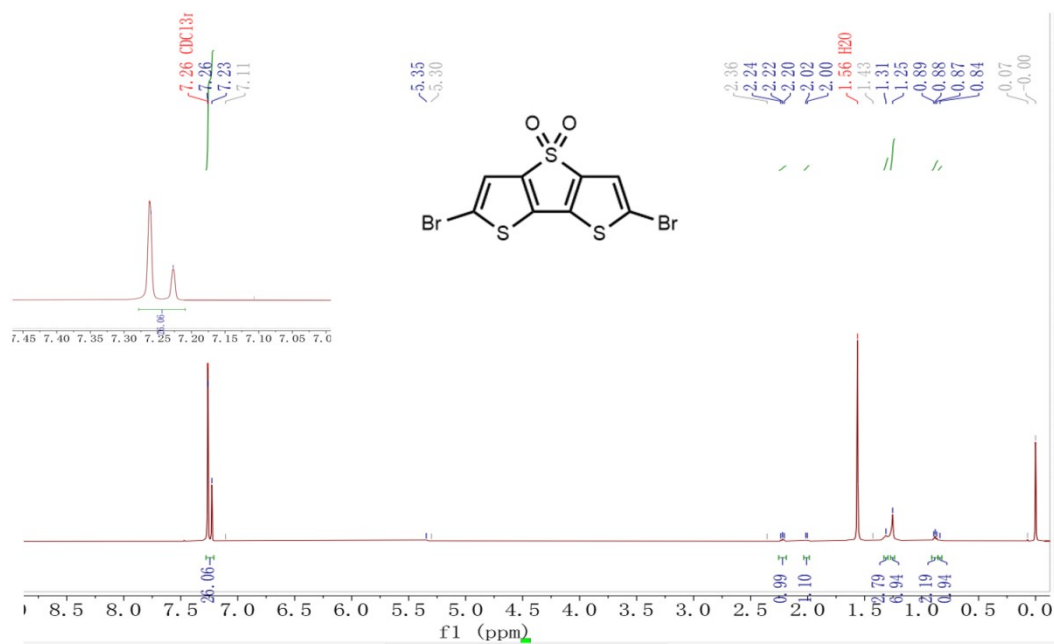

**Figure S2.**  $^1\text{H}$  NMR (500 MHz,  $\text{CDCl}_3$ ) of **TzDTDO**.

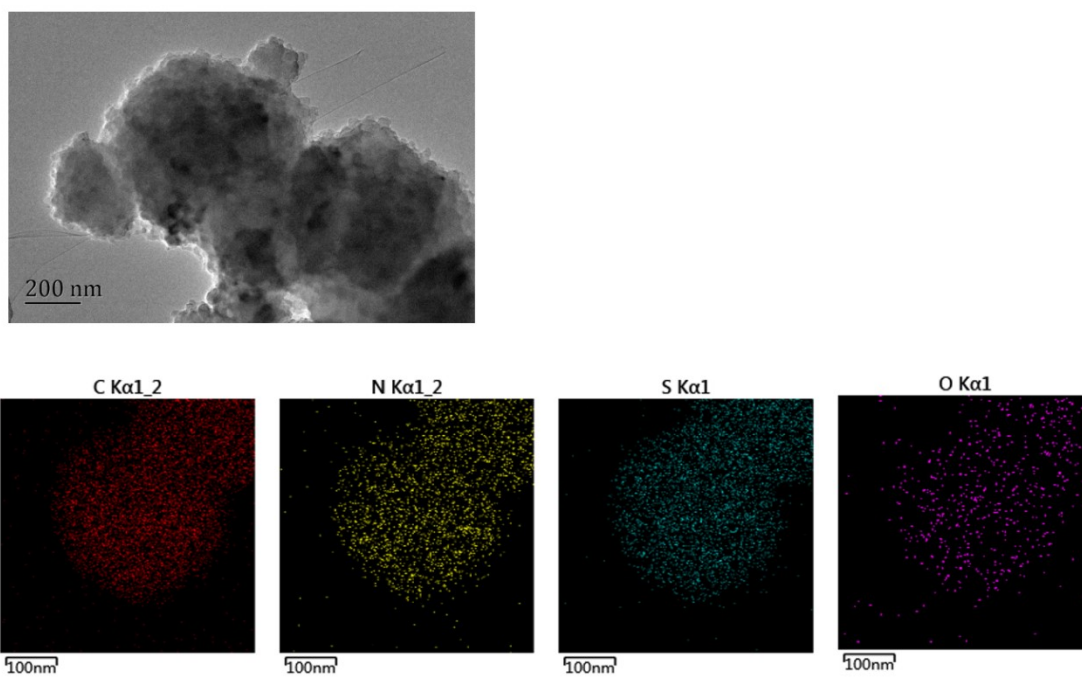

**Figure S3.** The elemental mapping of TzDTT.

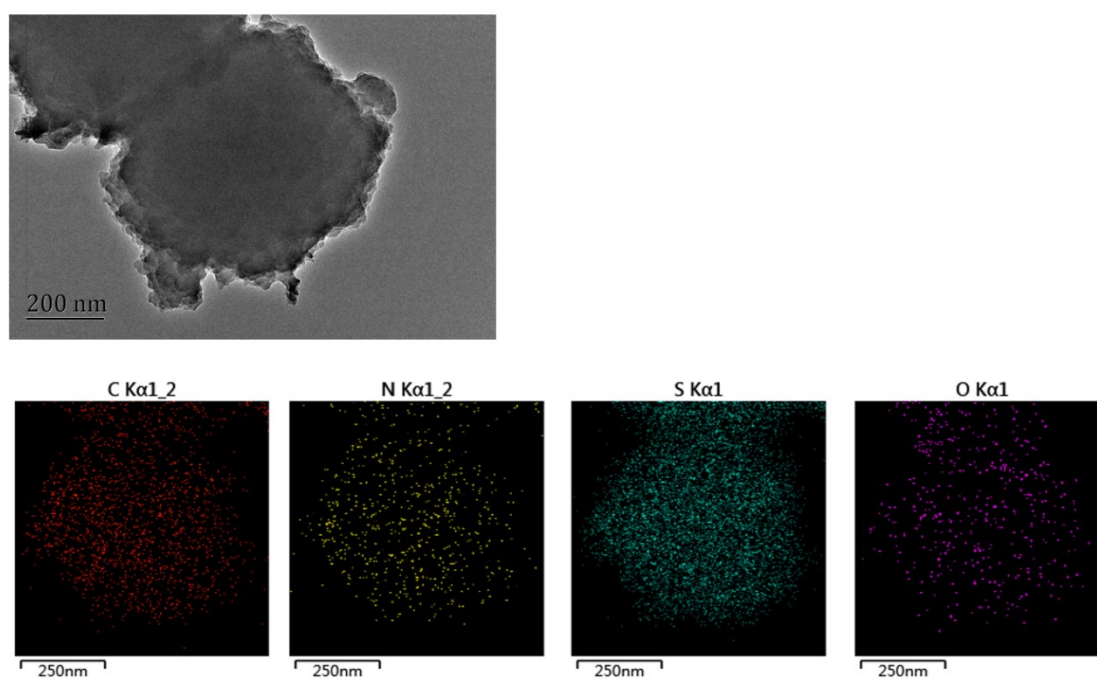

**Figure S4.** The elemental mapping of TzDTDO.

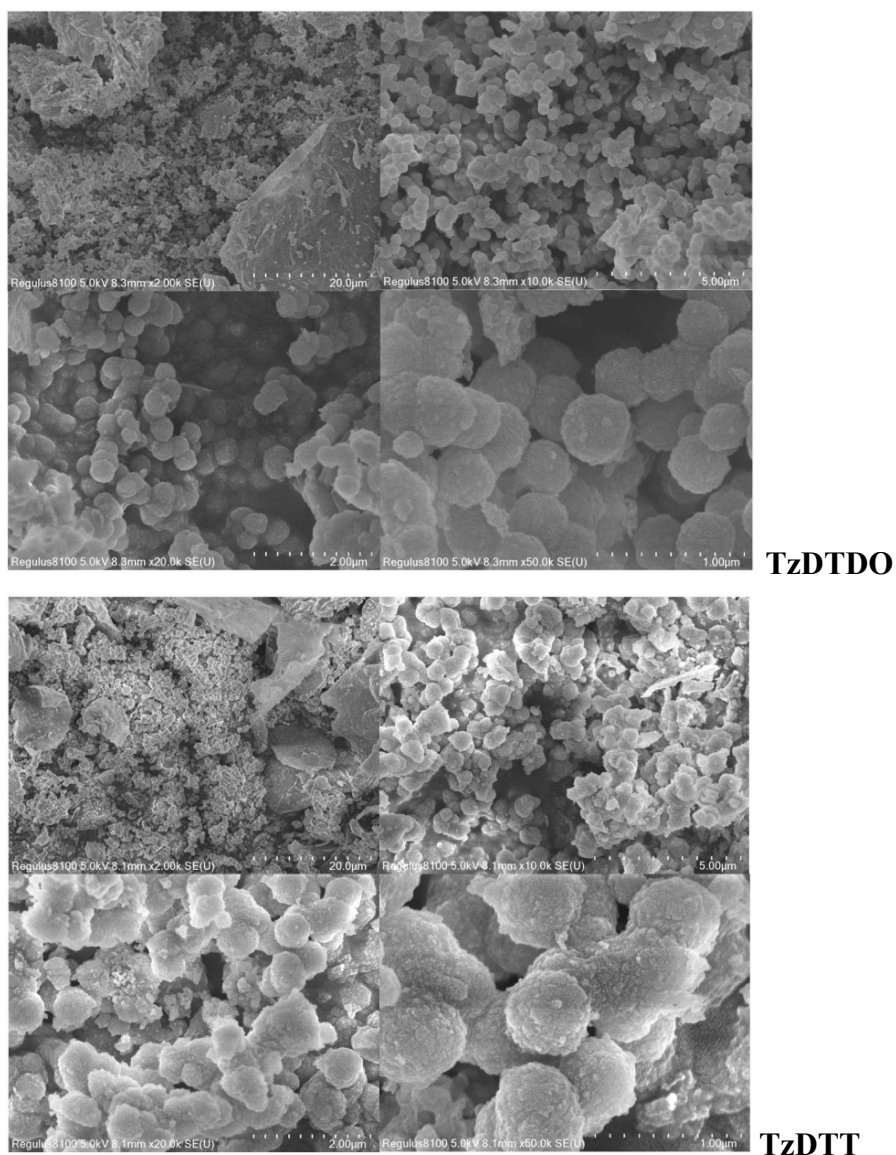

**Figure S5.** Scanning electron microscope images of **TzDTDO** and **TzDTT**

**Table S1.** Element analysis of obtained polymers

| sample | composition | C (%) | H (%) | N (%) | S (%) | O (%) | B, Pd, Br, or P (%) | C : N | C : S |
|--------|-------------|-------|-------|-------|-------|-------|---------------------|-------|-------|
| TzDTDO | Calculated  | 61.38 | 2.34  | 6.51  | 22.34 | 7.34  | —                   | 9.43  | 2.75  |
|        | Found       | 47.85 | 2.52  | 4.76  | 14.6  | 16.1  | 14.17               | 10.1  | 3.28  |
| TzDTT  | Calculated  | 66.31 | 2.53  | 7.03  | 24.31 | —     | —                   | 9.43  | 2.73  |
|        | Found       | 51.47 | 2.43  | 5.42  | 14.89 | 11.05 | 14.74               | 9.49  | 3.46  |

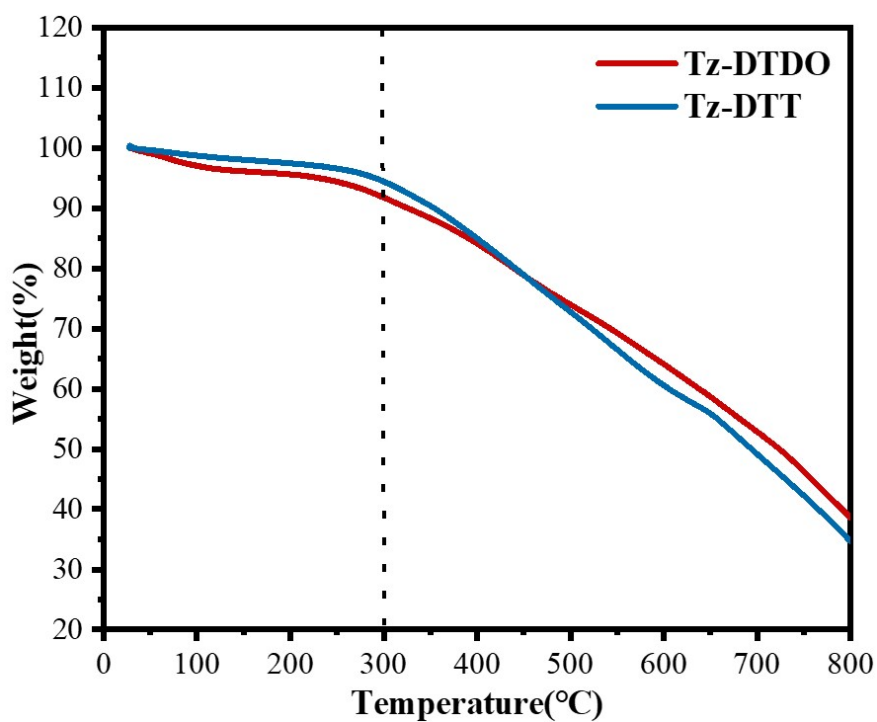

**Figure S6.** Thermogravimetric analysis(TGA) profile of polymers under N<sub>2</sub> atmosphere.

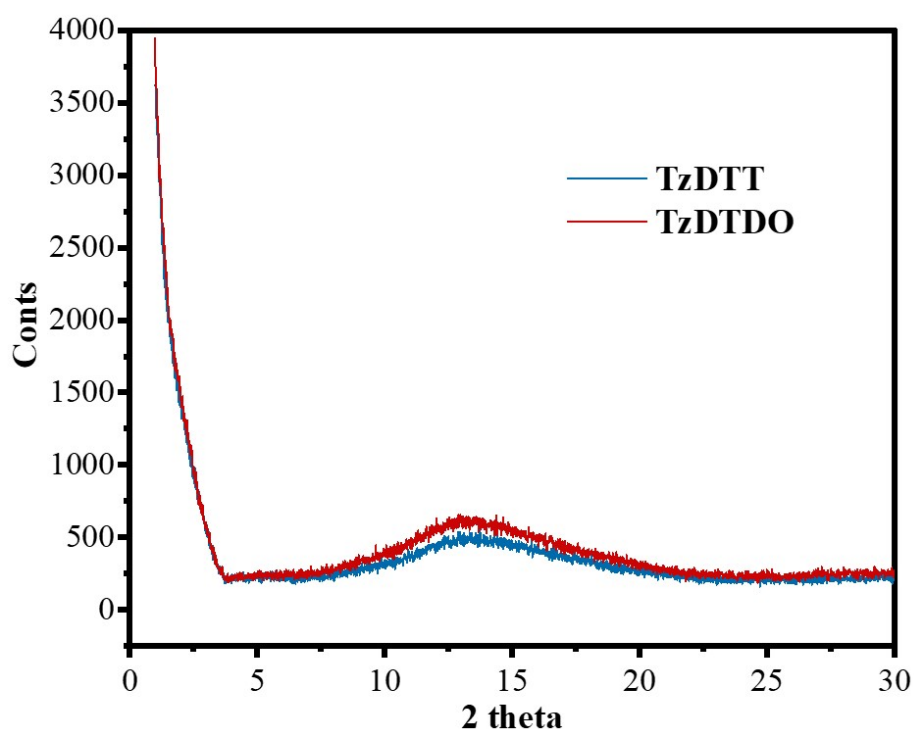

**Figure S7.** Powder XRD patterns of TzDTT and TzDTDO.



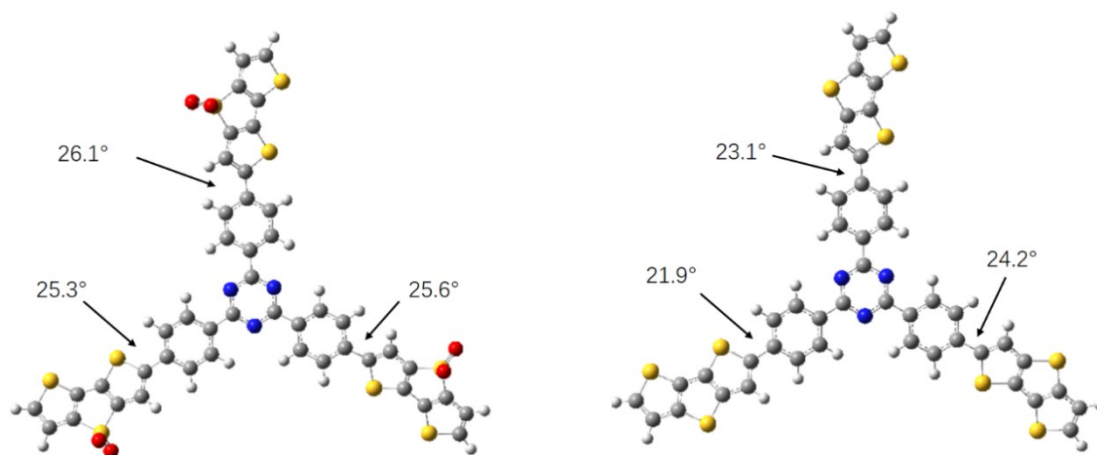

**Figure S8.** DFT geometry optimization and the dihedral angles of the polymers.

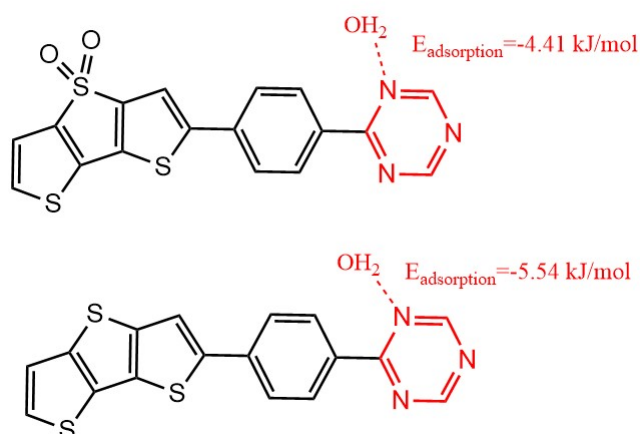

**Theoretical and experimental level distribution and the adsorption energy of water molecules**

| CMPs          | $E_{CB}(eV)$ | $E_{VB}(eV)$ | $E_{g,opt}(eV)$ | $LUMO_{cal}(eV)$ | $HOMO_{cal}(eV)$ | $E_{g,cal}$ | $E_{adsorption}(kJ/mol)$ |
|---------------|--------------|--------------|-----------------|------------------|------------------|-------------|--------------------------|
| <b>TzDTDO</b> | -3.17        | -5.37        | 2.20            | -2.82            | -6.06            | 3.24        | -4.41                    |
| <b>TzDTT</b>  | -2.77        | -5.01        | 2.24            | -5.60            | -5.60            | 3.19        | -5.54                    |

**Figure S9.** The Models of the two polymers and water molecule calculated by DFT theory.

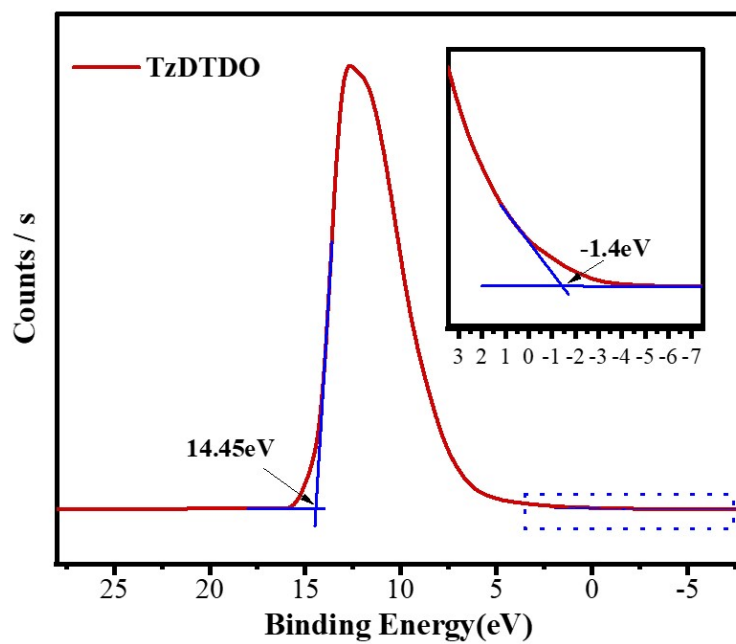

Figure S10. UPS spectrum of TzDTDO.

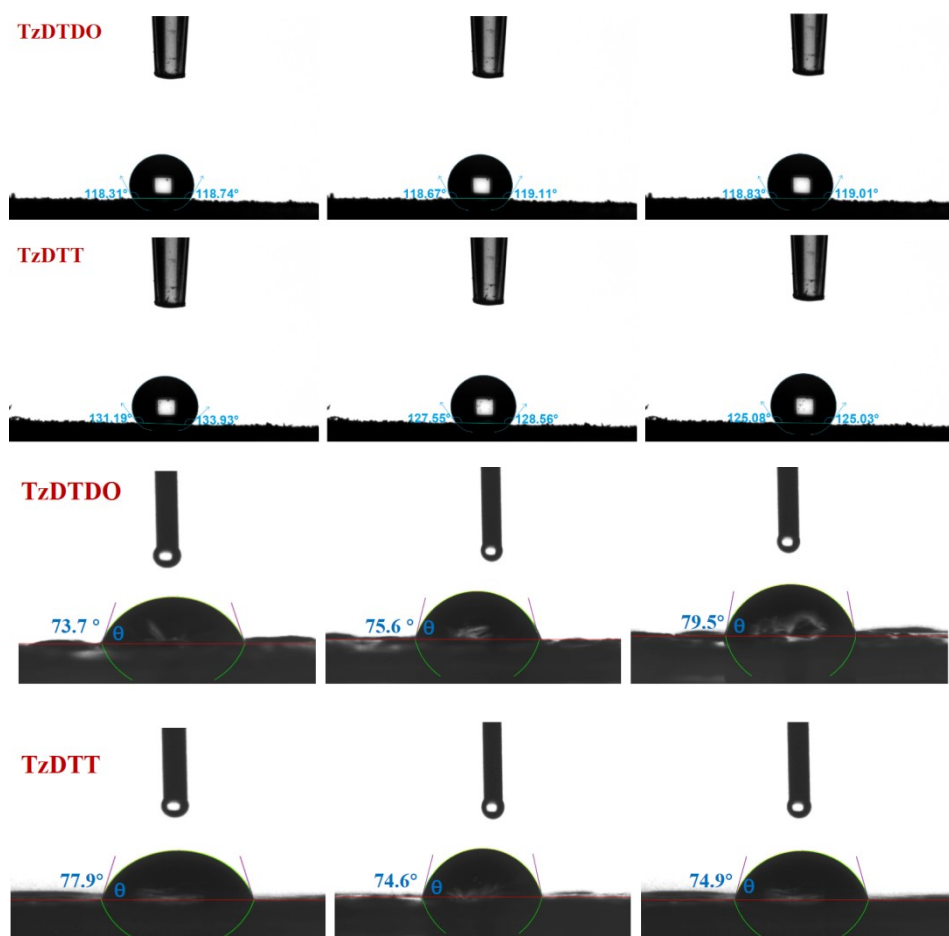

Figure S11. The contact angles of the two polymers.

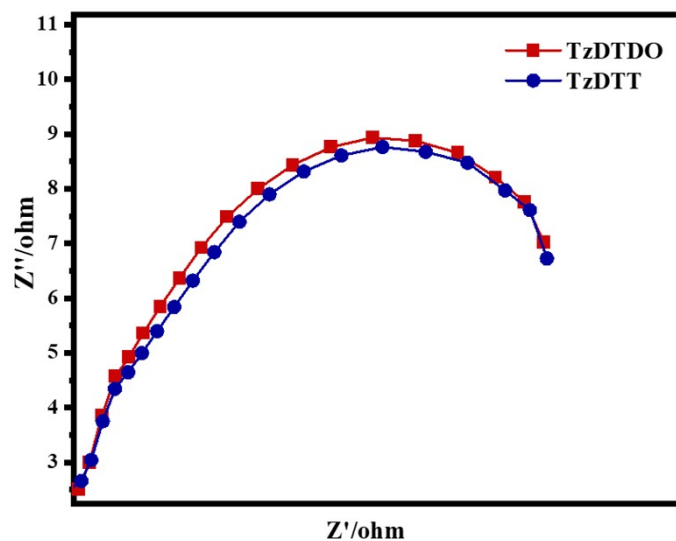

**Figure S12.** Electrochemical impedance spectroscopy (EIS) Nyquist plots of the polymers.

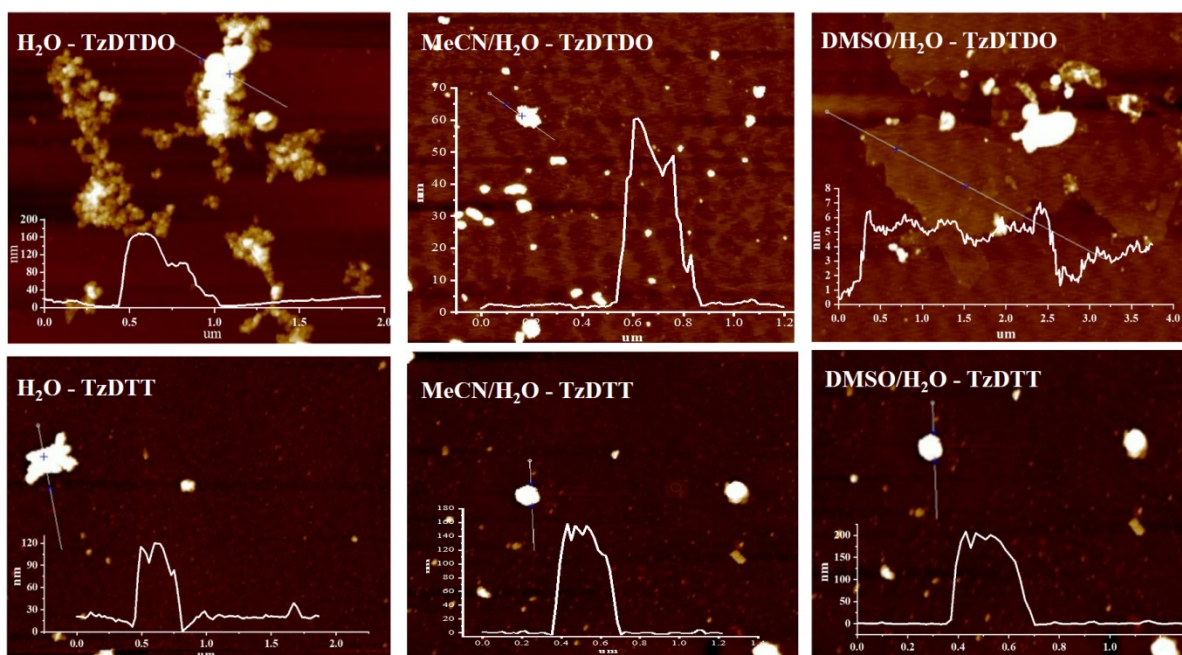

**Figure S13.** The AFM image of the two polymers dispersed ultrasonically in H<sub>2</sub>O, MeCN/H<sub>2</sub>O (1:2) and DMSO/H<sub>2</sub>O (1:2), respectively.

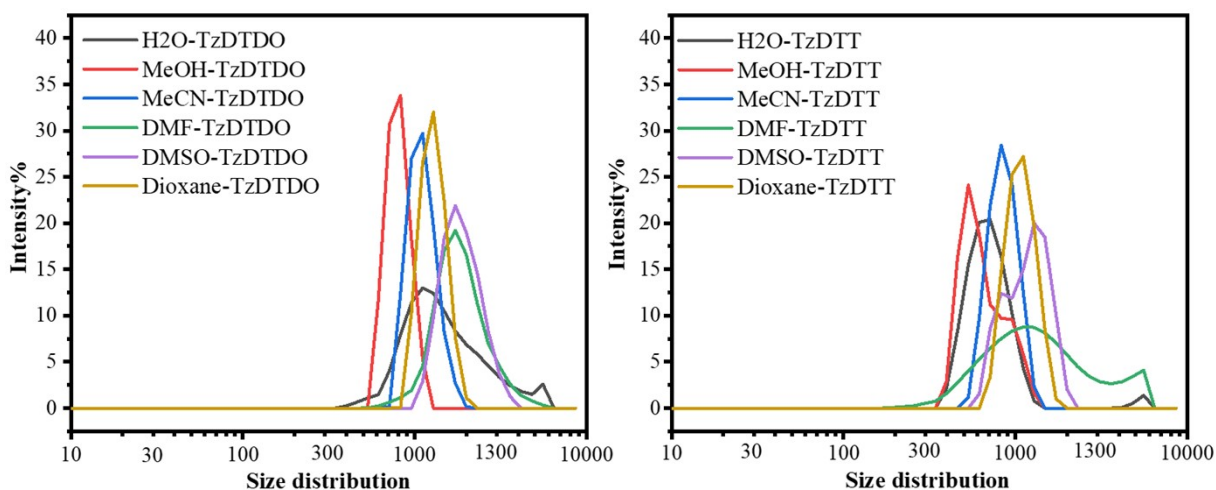

**Figure S14.** The size distribution of the two polymers measured by dynamic light scattering (DLS).

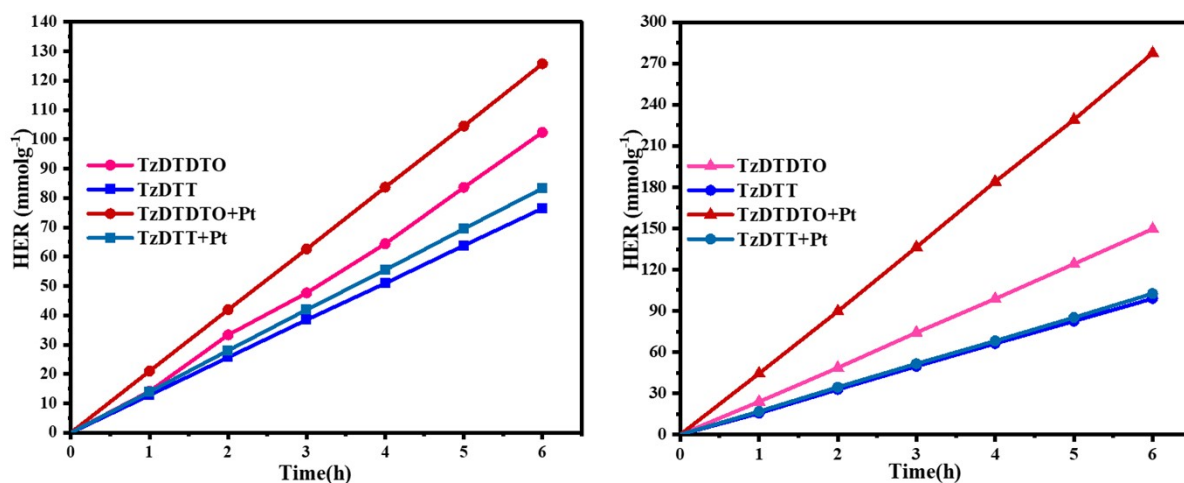

**Figure S15.** The HER performance of the two polymers under the light irradiation of  $>420$  nm (left) and AM1.5G (right figure) with AA as the electron sacrificial agent (right).

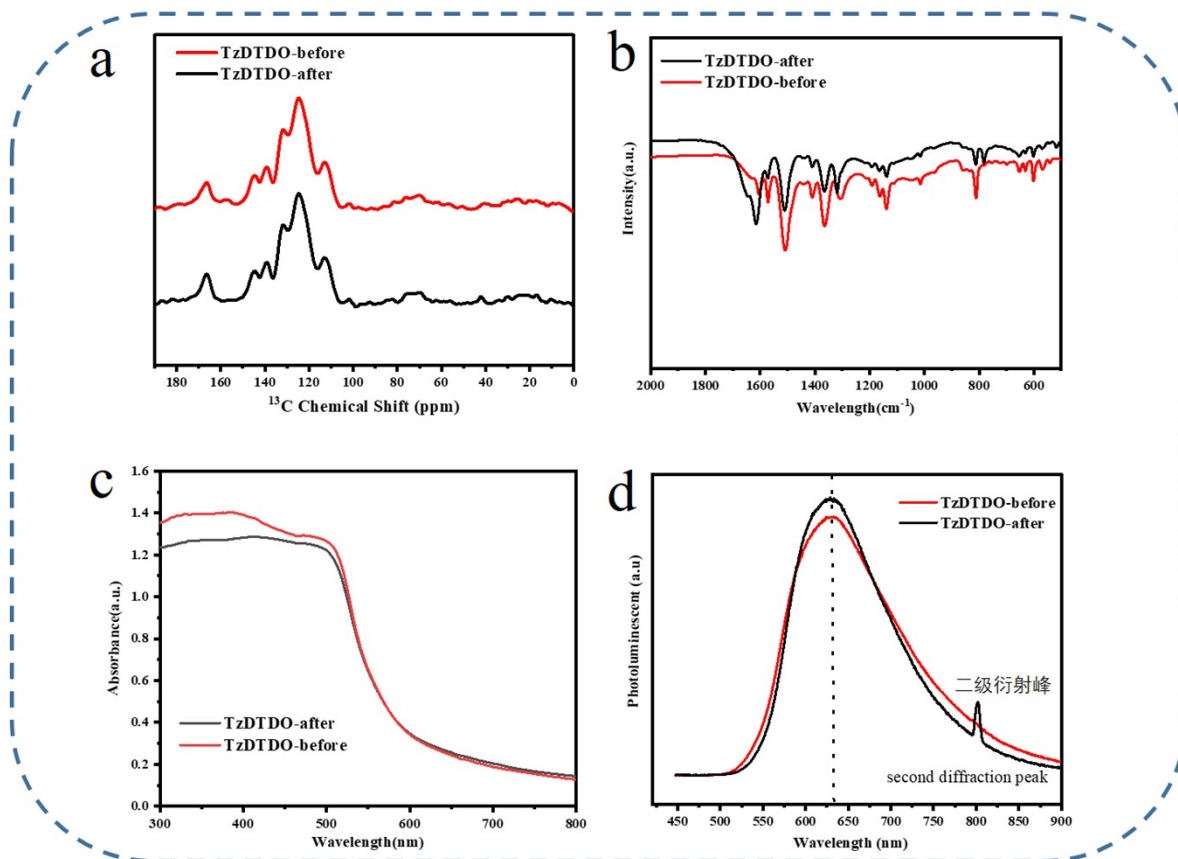

**Figure S16.** (a)The solid  $^{13}\text{C}$  NMR, (b)FT-IR, (c)solid UV/Vis and (d)PL spectra of TzDTDO before/after PHP in  $\text{H}_2\text{O}/\text{AA}$  for 24 h.

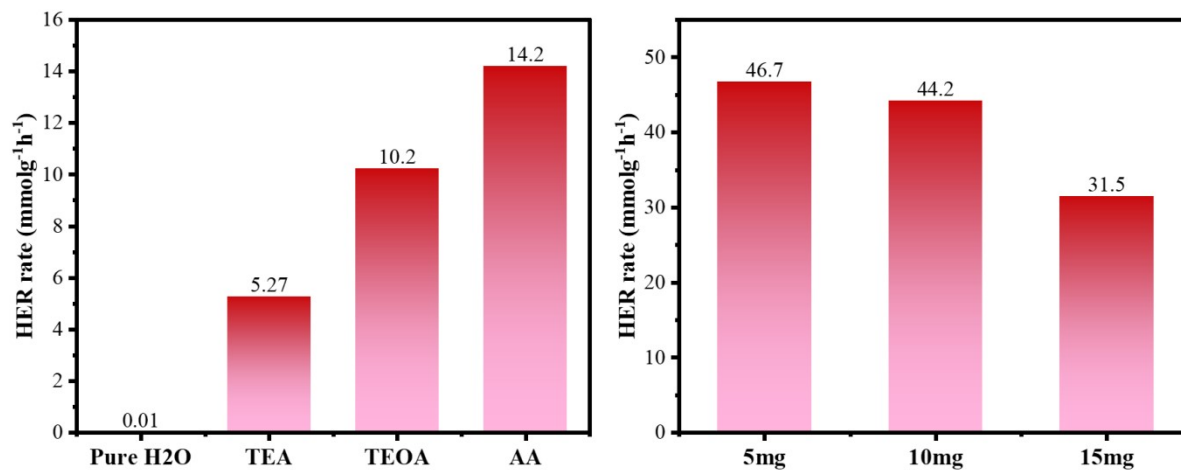

**Figure S17.** The HER rates of TzDTDO with different electron sacrificial agent (left) and in the presence of different amounts of photocatalyst (right).

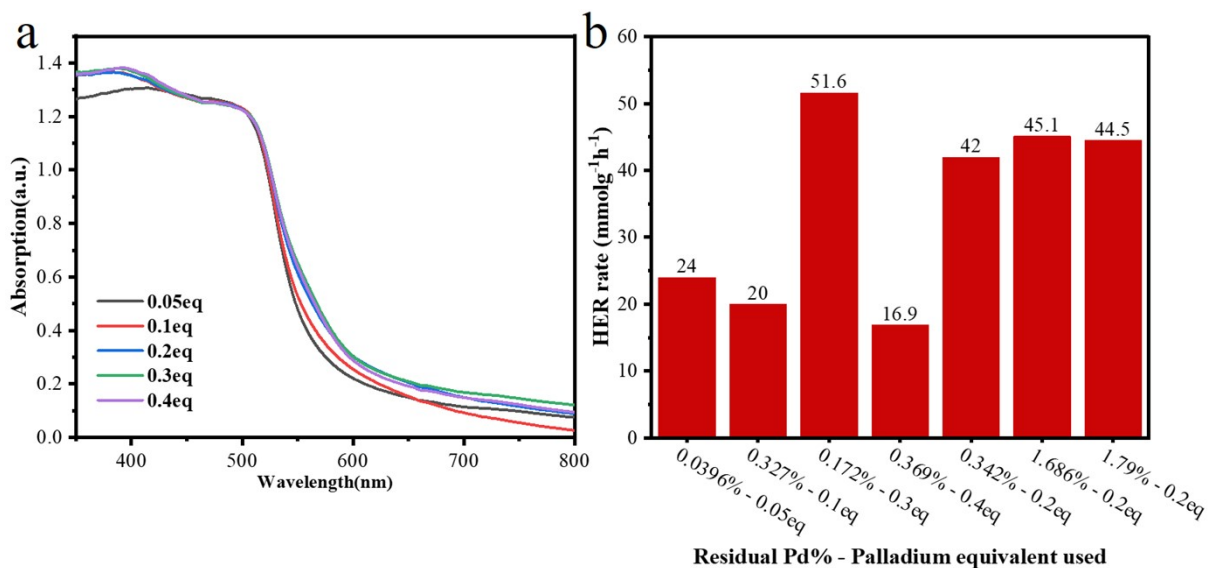

**Figure S18.** (a) DRS UV/Vis spectra of **TzDTDO** samples which were synthesized in the presence of various equivalents of catalyst  $\text{Pd}(\text{PPh}_3)_4$ . (b) HER performance of **TzDTDO** samples with residual Pd in various different masses.

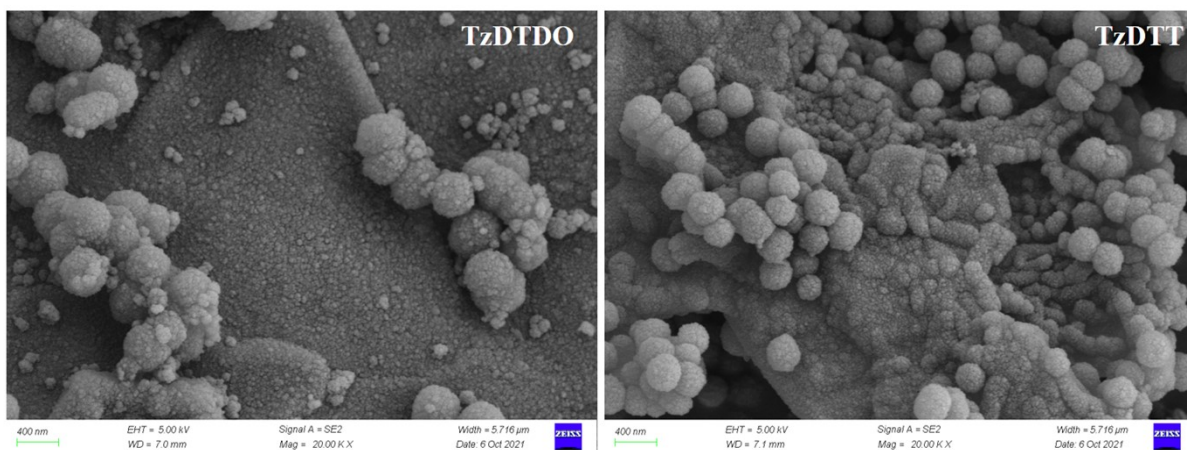

**Figure S19.** Morphology characterizations (SEM) after 24 h HER stability test.

**Table S2.** Fitted decay time in TRPL spectra of the two CMPs.

The fitting equation:  $y = A + B_1 \cdot \exp(-x/\tau_1) + B_2 \cdot \exp(-x/\tau_2) + B_3 \cdot \exp(-x/\tau_3)$

| sample        | $\tau_1$ (ns) | $\tau_2$ (ns) | $\tau_3$ (ns) | A       | B <sub>1</sub> % | B <sub>2</sub> % | B <sub>3</sub> % | Chi.sq(variance) |
|---------------|---------------|---------------|---------------|---------|------------------|------------------|------------------|------------------|
| <b>TzDTDO</b> | 0.167845      | 0.0446838     | 0.589145      | 3.44187 | 49.82            | 37.08            | 13.10            | 1.136915         |
| <b>TzDTT</b>  | 0.0888652     | 0.096708      | 0.0966508     | 1.55839 | 0.36             | 49.65            | 50.00            | 1.085422         |



**Table S3.** PHP Performance of **TzDTDO** and the other reported CMPs.

| Photocatalyst          | cocatalyst | PHP<br>(mmol g <sup>-1</sup> h <sup>-1</sup> ) | Irradiation<br>light | AQY%               | Reference |
|------------------------|------------|------------------------------------------------|----------------------|--------------------|-----------|
| TzDTDO                 | 3 wt% Pt   | 45.1                                           | AM1.5                | 7.74(10 mg@420 nm) | This work |
| P-CTF                  | 3 wt% Pt   | 0.659                                          | AM1.5                | 2.11@50mg          | 1         |
| PEG@BT-COF             | 3 wt% Pt   | 11.14                                          | >420 nm              | 11.2@420 nm        | 2         |
| TtaTfa                 | 3 wt% Pt   | 20.7                                           | >420 nm              | 1.43@450 nm        | 3         |
| PyTP-2                 | No         | 33.07                                          | >420 nm              | 14.8@500 nm        | 4         |
| PBDTTS-1SO             | 3 wt% Pt   | 97.1                                           | >420 nm              | 18@500 nm          | 5         |
| BTT-CPP                | No         | 37.86                                          | UV-vis               | 3.3@365 nm         | 6         |
| BSO <sub>2</sub> -EDOT | No         | 158                                            | >420 nm              | 13.6@550 nm        | 7         |
| PDBTSSO-T              | 3 wt% Pt   | 147                                            | UV-vis               | No                 | 8         |
| TP-BTDO-2              | No         | 108.59                                         | >420 nm              | 30.48@520 nm       | 9         |
| CTF NSs                | No         | 25.7                                           | >420 nm              | No                 | 10        |
| PyBS-3                 | 3 wt% Pt   | 43                                             | >420 nm              | 29.2@420 nm        | 11        |
| PyTz-COF               | 3 wt% Pt   | 2.07                                           | AM1.5                | No                 | 12        |
| BTH-3                  | No         | 15.1                                           | >420 nm              | 1.256@500nm        | 13        |
| CMPBDP@T-10            | 1 wt% Pt   | 40                                             | UV-vis               | No                 | 14        |
| Py-Tt                  | No         | 45.8                                           | UV-vis               | No                 | 15        |
| triazine-Ph-CPP        | No         | 16.28                                          | UV-vis               | 61.5@365 nm        | 16        |
| PDBTSSO                | 3 wt% Pt   | 44.2                                           | >420 nm              | No                 | 17        |
| PyDTDO-3               | No         | 16.32                                          | >420 nm              | 3.93@550 nm        | 18        |
| PyDF                   | 3 wt% Pt   | 18.93                                          | UV-vis               | 4.5@400 nm         | 19        |
| CP-St                  | No         | 105.4                                          | >420 nm              | 11.4@550 nm        | 20        |
| FS-COF                 | 3 wt% Pt   | 10.1                                           | AM1.5G               | 7.8@420 nm         | 21        |
| ter-CTF-0.7            | 3 wt% Pt   | 19.3                                           | >420 nm              | 22.8@420 nm        | 22        |

## References

- 1 H. Ye, N. Gong, Y. Cao, X. Fan, X. Song, H. Li, C. Wang, Y. Mei and Y. Zhu, *Chem. Mater.*, 2022, **34**, 1481-1490.
- 2 T. Zhou, L. Wang, X. Huang, J. Unruangsri, H. Zhang, R. Wang, Q. Song, Q. Yang, W. Li, C. Wang, K. Takahashi, H. Xu and J. Guo, *Nat. Commun.*, 2021, **12**, 3934.
- 3 J. Yang, A. Acharjya, M. Y. Ye, J. Rabeah, S. Li, Z. Kochovski, S. Youk, J. Roeser, J. Gruneberg, C. Penschke, M. Schwarze, T. Wang, Y. Lu, R. van de Krol, M. Oschatz, R. Schomacker, P. Saalfrank and A. Thomas, *Angew. Chem., Int. Ed.*, 2021, **60**, 19797-19803.
- 4 S. Xiang, C. Han, C. Shu, C. Zhang and J.-X. Jiang, *Sci. China Mater.*, 2021, **65**, 422-430.
- 5 W.-C. Lin, J. Jayakumar, C.-L. Chang, L.-Y. Ting, T.-F. Huang, M. H. Elsayed, A. M. Elewa, Y.-T. Lin, J.-J. Liu, Y.-T. Tseng and H.-H. Chou, *J. Mater. Chem. A.*, 2022.
- 6 J.-l. Wang, G. Ouyang, D. Wang, J. Li, J. Yao, W.-S. Li and H. Li, *Macromolecules*, 2021, **54**, 2661-2666.
- 7 Z.-R. Tan, Y.-Q. Xing, J.-Z. Cheng, G. Zhang, Z.-Q. Shen, Y.-J. Zhang, G. Liao, L. Chen and S.-Y. Liu, *Chem. Sci.*, 2022, **13**, 1725-1733.
- 8 Y. Liu, J. Wu and F. Wang, *Appl. Catal. B.*, 2022, **307**, 121144.
- 9 C. Han, S. Xiang, S. Jin, L.-W. Luo, C. Zhang, C. Yan and J.-X. Jiang, *J. Mater. Chem. A.*, 2022, **10**, 5255-5261.
- 10 C. Wang, H. Zhang, W. Luo, T. Sun and Y. Xu, *Angew. Chem., Int. Ed.*, 2021, **60**, 25381-25390.
- 11 C. Shu, C. Han, X. Yang, C. Zhang, Y. Chen, S. Ren, F. Wang, F. Huang and J. X. Jiang, *Adv. Mater.*, 2021, **33**, e2008498.
- 12 W. Li, X. Huang, T. Zeng, Y. A. Liu, W. Hu, H. Yang, Y. B. Zhang and K. Wen, *Angew. Chem., Int. Ed.*, 2021, **60**, 1869-1874.
- 13 Y. Wang, W. Hao, H. Liu, R. Chen, Q. Pan, Z. Li and Y. Zhao, *Nat. Commun.*, 2022, **13**, 100.
- 14 L. Collado, T. Naranjo, M. Gomez-Mendoza, C. G. López-Calixto, F. E. Oropeza, M. Liras, J. Marugán and V. A. Peña O'Shea, *Adv. Funct. Mater.*, 2021, **31**, 2105384.
- 15 J.-Z. Cheng, Z.-R. Tan, Y.-Q. Xing, Z.-Q. Shen, Y.-J. Zhang, L.-L. Liu, K. Yang, L. Chen and S.-Y. Liu, *J. Mater. Chem. A.*, 2021, **9**, 5787-5795.
- 16 J. Wang, G. Ouyang, Y. Wang, X. Qiao, W. S. Li and H. Li, *Chem. Commun.*, 2020, **56**, 1601-1604.
- 17 G. Shu, Y. Li, Z. Wang, J.-X. Jiang and F. Wang, *Appl. Catal. B.*, 2020, **261**, 118230.
- 18 C. Han, P. Dong, H. Tang, P. Zheng, C. Zhang, F. Wang, F. Huang and J. X. Jiang, *Chem. Sci.*, 2020, **12**, 1796-1802.
- 19 X. Gao, C. Shu, C. Zhang, W. Ma, S.-B. Ren, F. Wang, Y. Chen, J. H. Zeng and J.-X. Jiang, *J. Mater. Chem. A.*, 2020, **8**, 2404-2411.
- 20 J.-Z. Cheng, L.-L. Liu, G. Liao, Z.-Q. Shen, Z.-R. Tan, Y.-Q. Xing, X.-X. Li, K. Yang, L. Chen and S.-Y. Liu, *J. Mater. Chem. A.*, 2020, **8**, 5890-5899.
- 21 X. Wang, L. Chen, S. Y. Chong, M. A. Little, Y. Wu, W. H. Zhu, R. Clowes, Y. Yan, M. A. Zwijnenburg, R. S. Sprick and A. I. Cooper, *Nat. Chem.*, 2018, **10**, 1180-1189.
- 22 L. Guo, Y. Niu, S. Razzaque, B. Tan and S. Jin, *ACS Catalysis*, 2019, **9**, 9438-9445.
